# Supplementary material
Source: PubMed Central journal article supplement (PMC6878195)
Supplement: NIHMS1540875-supplement-Supplemental_Material.pdf [file NIHMS1540875-supplement-Supplemental_Material.pdf]

SUPPLEMENTAL MATERIAL

Supplementary table I – Comparison of included participants vs. those excluded (missing ACR)

|                                      | Included in the analysis<br>(n=8,913) | Excluded (missing ACR)<br>(n=448) | <i>P</i> value   |
|--------------------------------------|---------------------------------------|-----------------------------------|------------------|
| Age (years)                          | 67.9 ± 9.4                            | 67.3 ± 8.8                        | 0.14             |
| Female sex (n, %)                    | 3147 (35.3%)                          | 185 (41.3%)                       | <b>0.01</b>      |
| Race or ethnic group (n, %)          |                                       |                                   |                  |
| Non-Hispanic white                   | 5116 (57.4%)                          | 283 (63.2%)                       | <b>0.033</b>     |
| Non-Hispanic black                   | 2690 (30.2%)                          | 112 (25.0%)                       |                  |
| Hispanic                             | 943 (10.6%)                           | 41 (9.2%)                         |                  |
| Other                                | 164 (1.8%)                            | 12 (2.7%)                         |                  |
| Baseline blood pressure (mmHg)       |                                       |                                   |                  |
| Systolic                             | 139.7 ± 15.6                          | 139.1 ± 15.1                      | 0.47             |
| Diastolic                            | 78.1 ± 12.0                           | 78.2 ± 11.1                       | 0.89             |
| Antihypertensive agents (n)          | 2.0 (1.0-3.0)                         | 2.0 (1.0-2.0)                     | 0.13             |
| Cardiovascular disease (n, %)        | 1,804 (20.2%)                         | 73 (16.3%)                        | <b>0.042</b>     |
| Body mass index (kg/m <sup>2</sup> ) | 29.9 ± 5.8                            | 29.3 ± 5.4                        | <b>0.033</b>     |
| Fasting plasma glucose (mg/dL)       | 98.9 ± 13.6                           | 97.6 ± 11.7                       | 0.055            |
| Fasting total cholesterol (mg/dL)    | 189.9 ± 41.1                          | 194.3 ± 43.2                      | <b>0.03</b>      |
| Fasting HDL cholesterol (mg/dL)      | 52.8 ± 14.5                           | 54.0 ± 13.4                       | 0.087            |
| Fasting total triglycerides (mg/dL)  | 107.0 (77.0-150.0)                    | 99.0 (72.0-139.0)                 | <b>0.007</b>     |
| Statin use (n, %)                    | 3,893 (44.0%)                         | 161 (37.6%)                       | <b>0.01</b>      |
| Aspirin use (n, %)                   | 4,540 (51.0%)                         | 216 (50.3%)                       | 0.79             |
| Current smoker (n, %)                | 3797 (42.6%)                          | 176 (39.3%)                       | 0.166            |
| eGFR (mL/min/1.73 m <sup>2</sup> )   | 71.6 ± 20.7                           | 74.4 ± 18.5                       | <b>0.007</b>     |
| Chronic kidney disease - n (%)       | 2,554 (28.7%)                         | 92 (20.5%)                        | <b>&lt;0.001</b> |

ACR, albumin-to-creatinine ratio; eGFR, estimated glomerular filtration rate; HDL, High-density lipoprotein.

**Supplementary table II - Association of albuminuria with secondary outcomes**

|                              | Categorical analysis       |                         | Continuous analysis |
|------------------------------|----------------------------|-------------------------|---------------------|
|                              | No albuminuria<br>(n=7183) | Albuminuria<br>(n=1730) | LogACR<br>(n=8913)  |
|                              | No. Events/Pts             | No. Events/Pts          | HR (95% CI)         |
| <b>Myocardial infarction</b> |                            |                         |                     |
| No. Events/Pts               | 136/7110 (1.9%)            | 72/1694 (4.3%)          | 208/8804 (2.4%)     |
| Unadjusted HR                | Ref.                       | 2.28 (1.71-3.05)        | 1.29 (1.17-1.42)    |
| Adjusted HR                  | Ref.                       | 1.95 (1.43-2.66)        | 1.20 (1.08-1.34)    |
| <b>Other ACS</b>             |                            |                         |                     |
| No. Events/Pts               | 60/7110 (0.8%)             | 18/1693 (1.1%)          | 78/8803 (0.9%)      |
| Unadjusted HR                | Ref.                       | 1.32 (0.77-2.26)        | 1.15 (0.97-1.37)    |
| Adjusted HR                  | Ref.                       | 1.18 (0.67-2.08)        | 1.10 (0.91-1.33)    |
| <b>Heart failure</b>         |                            |                         |                     |
| No. Events/Pts               | 85/7110 (1.2%)             | 75/1696 (4.4%)          | 160/8806 (1.8%)     |
| Unadjusted HR                | Ref.                       | 3.61 (2.63-4.97)        | 1.65 (1.50-1.82)    |
| Adjusted HR                  | Ref.                       | 2.57 (1.81-3.63)        | 1.47 (1.32-1.65)    |
| <b>Cardiovascular death</b>  |                            |                         |                     |
| No. Events/Pts               | 59/7115 (0.8%)             | 40/1697 (2.4%)          | 99/8812 (1.1%)      |
| Unadjusted HR                | Ref.                       | 2.95 (1.95-4.46)        | 1.62 (1.43-1.83)    |
| Adjusted HR                  | Ref.                       | 1.87 (1.18-2.96)        | 1.44 (1.25-1.66)    |
| <b>Composite CV outcome</b>  |                            |                         |                     |
| No. Events/Pts               | 356/7116 (5.0%)            | 193/1698 (11.4%)        | 549/8814 (6.2%)     |
| Unadjusted HR                | Ref.                       | 2.32 (1.94-2.77)        | 1.40 (1.32-1.48)    |
| Adjusted HR                  | Ref.                       | 1.86 (1.54-2.25)        | 1.30 (1.22-1.39)    |

Adjusted model: age, sex, race, smoking status, systolic BP, antihypertensive agents, prior cardiovascular disease (CVD), body mass index, estimated glomerular filtration rate (eGFR), triglycerides, total cholesterol, HDL cholesterol, plasma glucose, statin use, aspirin use, and randomized treatment arm.

HR, hazard ratio; CI, confidence interval; ACR, urinary albumin-to-creatinine ratio; ACS, acute coronary syndrome, CV, cardiovascular. Ref., reference category.

**Supplementary table III - Association of albuminuria with myocardial infarction and heart failure according to randomized treatment arm**

|                              | Standard treatment arm     |                        | Intensive treatment arm    |                        |
|------------------------------|----------------------------|------------------------|----------------------------|------------------------|
|                              | No albuminuria<br>(n=3588) | Albuminuria<br>(n=873) | No albuminuria<br>(n=3595) | Albuminuria<br>(n=857) |
| <b>Myocardial infarction</b> |                            |                        |                            |                        |
| No. Events/Pts               | 56/3559 (1.6%)             | 39/858 (4.5%)          | 80/3551 (2.3%)             | 33/836 (3.9%)          |
| Unadjusted HR                | Ref.                       | 2.97 (1.94-4.53)       | Ref.                       | 1.72 (1.13-2.62)       |
| Adjusted HR                  | Ref.                       | 2.59 (1.62-4.12)       | Ref.                       | 1.52 (0.98-2.38)       |
| <b>Heart failure</b>         |                            |                        |                            |                        |
| No. Events/Pts               | 26/3559 (0.7%)             | 35/859 (4.1%)          | 59/3551 (1.7%)             | 40/837 (4.8%)          |
| Unadjusted HR                | Ref.                       | 5.66 (3.32-9.64)       | Ref.                       | 2.82 (1.86-4.28)       |
| Adjusted HR                  | Ref.                       | 4.24 (2.32-7.74)       | Ref.                       | 1.96 (1.24-3.09)       |

Adjusted model: age, sex, race, smoking status, systolic BP, antihypertensive agents, prior cardiovascular disease (CVD), body mass index, estimated glomerular filtration rate (eGFR), triglycerides, total cholesterol, HDL cholesterol, plasma glucose, statin use, aspirin use.

HR, hazard ratio; CI, confidence interval. Ref., reference category.
